# Supplementary material for: NMFP: a non-negative matrix factorization based preselection method to increase accuracy of identifying mRNA isoforms from RNA-seq data
Source: Springer Nature journal article supplement (doi:10.1186/s12864-015-2304-8), 2016-01-01
Supplement: 12864_2015_2304_MOESM1_ESM.pdf [file 12864_2015_2304_MOESM1_ESM.pdf]

# Additional File for “A non-negative matrix factorization based preselection procedure for more accurate isoform discovery from RNA-seq data”

Yuting Ye\*

*Division of Biostatistics, University of California, Berkeley*

Jingyi Jessica Li†

*Department of Statistics, University of California, Los Angeles*

## 1 Subexons and contradicting bins

### 1.1 Definition of subexons

Exons are not the minimal splicing units. In some types of alternative splicing, such as alternative 5' ends and alternative 3' ends, splicing can occur inside an exon. Also, there can be differences between the exon boundaries from annotations and those from de novo assemblies. Hence to capture slight differences among isoform structures, we split exons into *subexons*, the minimal splicing units. Subexons are defined as non-overlapping transcribed regions between adjacent splicing sites. Every exon in the input annotation or de novo assembly can be fully recovered by a set of subexons. For illustration of subexons, please see Figure 1 extracted from the SLIDE paper[1].

### 1.2 Contradicting bins

We define *bins* as two-dimensional vectors that describe the exon indices of the starting and ending positions of mapped reads (single-ended reads or paired-end reads decomposed into two ends). For example, Bin (4, 4) contains reads whose starting and ending positions

---

\*Email: [yeyt@berkeley.edu](mailto:yeyt@berkeley.edu)

†Email: [jli@stat.ucla.edu](mailto:jli@stat.ucla.edu); Corresponding author

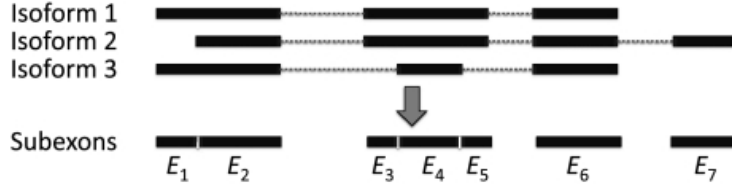

Figure 1: **Definition of the subxon**

are both in Subxon 4. For reads that cannot originate from the same transcript, their corresponding bins are mutually exclusive. We call them *contradicting bins*. For example, Bins (4, 4) and (3, 5) are contradicting bins, because Bin (4, 4) indicates the existence of Subxon 4 but Bin (3, 5) indicates the skipping of Subxon 4.

### 1.3 Decomposing isoforms candidates containing contradicting bins

After non-negative matrix factorization (NMF) is completed, a basis matrix  $W$  would be obtained, and each column of  $W$  represents an isoform candidate (See the main text). However, isoform candidates may contain contradicting bins, and such candidates cannot be true isoforms. To resolve this issue without losing possibly true isoforms, we decompose an isoform candidate with two contradicting bins into two isoform candidates, each containing one of the two bins. We use **Figure 1** as an example. Suppose an isoform candidate contains contradicting Bins (4, 4) and (3, 5), which indicate contradicting status of Subxon 4. Suppose all the other bins are non-contradicting and indicate the existence of Subxons 1, 2, 3, 5, 6, and 7. Then we decompose the isoform candidate into two candidates: 1111111 and 1110111, where the former contains all subexons and supports Bin (4, 4) while the latter excludes Subxon 4 and supports Bin (3, 5). This procedure is to reduce our chance of missing true isoforms.

## 2 $K$ -means and gap statistic

### 2.1 Motivation

With objective function  $\min_{W \geq 0, H \geq 0} \|V - WH\|_F$  and additional orthogonality constraint on  $H$ , i.e.,  $H^T H = I$ , NMF can be regarded as one type of  $K$ -means clustering on the bins (rows of  $V$ ) with non-negativity constraint. The reason is that the purpose of NMF is to cluster bins into *bin groups*, which are sub-structures of isoforms and can form into multiple isoforms including the true ones. This motivated us to use the *gap statistic*, a method for choosing the number of cluster  $K$  in  $K$ -means clustering, to select the rank of NMF. Gap

statistic was proposed by Tibshirani et al. [2] and has since been a widely used metric for choosing  $K$  in  $K$ -means clustering because of its good performance in estimating the number of well separated clusters.

## 2.2 $K$ -means clustering

Suppose there are  $n$   $p$ -dimensional data points,  $X_1, X_2, \dots, X_n \in \mathbb{R}^p$  and the goal is to cluster them into  $K$  clusters  $C_1, \dots, C_K$ . Given  $K$ ,  $K$ -means clustering would assign the  $n$  data points to  $K$  clusters, i.e., find the cluster memberships  $C_1, \dots, C_K$  by minimizing the following objective function

$$\arg \min_{C_1, \dots, C_K} \sum_{r=1}^K \sum_{i \in C_r} \|X_i - \mu_r\|, \quad (1)$$

where  $\mu_r$  is the mean of cluster  $C_r$ , which is a subset of the  $n$  data points. Formula (1) is equivalent to

$$\arg \min_{C_1, \dots, C_K} \sum_{r=1}^K \frac{1}{2n_r} \sum_{i, j \in C_r} d_{ij} \quad (2)$$

$n_r$  is the number of points in cluster  $C_r$  and  $d_{ij}$  is the distance between  $X_i$  and  $X_j$ , i.e.  $\|X_i - X_j\|$ . There are many choices for the distance metric, such as the Euclidean distance. The objective function  $W_K = \sum_{r=1}^K \frac{1}{2n_r} \sum_{i, j \in C_r} d_{ij}$  is the within-cluster variance, which is a basic statistic for determining  $K$ .

## 2.3 Gap statistic

Gap statistic is defined as  $Gap_n(k) = E_k^*[\log(W_k)] - \log(W_k)$ . The first term is the expected  $W_k$  under a reference distribution with no clusters, and the second term is the observed  $W_k$ . The idea is to choose the number of clusters as the value of  $k$  that leads to the largest  $Gap_n(k)$ . To estimate  $E_k^*[\log(W_k)]$ , the simplest reference distribution is the uniform distribution in all the  $p$  dimensions over the range of the observed data. The gap statistic algorithm sketched below is from the original gap statistics paper [2].

1. Vary the number of clusters  $k = 1, \dots, T$ , and cluster the data  $X_1, \dots, X_n$  by  $K$ -means clustering into  $k$  clusters, resulting in  $W_k$ ,  $k = 1, \dots, T$ , where  $T$  is the upper bound on  $k$ .
2. Generate  $B$  reference data sets from the specified reference distribution (e.g. uniform distribution). Then we cluster each data set into  $k$  clusters, resulting in  $W_{kb}^*$ ,  $k = 1, \dots, T$ ;  $b = 1, \dots, B$ .
3. Let  $\bar{w} = \frac{1}{B} \sum_{b=1}^B \log(W_{kb}^*)$ ,  $sd_k = \sqrt{\frac{1}{B} \sum_{b=1}^B (\log(W_{kb}^*) - \bar{w})^2}$ ,  $s_k = sd_k \sqrt{1 + \frac{1}{B}}$ .

4. Estimate the gap statistic as  $\hat{G}ap_n(k) = \bar{w} - \log(W_k)$ , for  $k = 1, \dots, T$ .
5. Choose the number of clusters as  $\hat{K} = \text{smallest } k \text{ s.t. } \hat{G}ap_n(k) \geq \hat{G}ap_n(k+1) - s_{k+1}$ .

## 2.4 Application of gap statistic to NMF rank determination

NMF is a way of  $K$ -means clustering that clusters the bins with similar expression levels into the bin groups, i.e., splicing structures that can be reconstructed into isoforms. In most cases, the number of bin groups is close to the number of isoforms. For example, assume there is a 5-subexon gene with 3 isoforms, 11111, 11011 and 11101. The relative abundance of the three isoforms are 50%, 35% and 15% respectively. Then the subexons have relative expression levels as 100%, 100%, 65%, 85% and 100% sequentially. Therefore, Subexons 1, 2 and 5 will be clustered into one bin group, while Subexon 3 and Subexon 4 will each be clustered as one bin group respectively. In this example, both the number of isoforms and the number of bin groups are 3. For genes with more complicated splicing structures, the number of bin groups may be more than the number of isoforms. In such cases, our estimated number of bin groups,  $\hat{K}$  from gap statistic, could be larger than the number of true isoforms. However, from our simulation results, we observed that NMFP is not sensitive to the NMF rank choice and performs reasonably well as long as the rank is no less than the number of annotated isoforms. (See the section **Low sensitivity of NMFP to ranks** in the main text.) Combined with the fact that gap statistic tends to be conservative [2], the NMF rank should be better chosen as larger than  $\hat{K}$ , the number of clusters chosen by the gap statistic on  $V$ . In our results, we chose the NMF rank as  $\hat{K} + 1$ .

## 3 More results

### 3.1 Robustness of NMFP to the choices of NMF rank (More results)

Continued from the main text, here we attach two more simulation examples to illustrate that NMFP is not sensitive to the choice of NMF rank. In **Figure 2(a)**, Gene *FBgn0259821* has three annotated isoforms (Ensemble BDGP6 of release 80) with 13 subexons. NMFP is able to capture all the annotated isoforms (recall rate = 1) regardless of the rank choices. The precision rate of NMFP is 1 when the rank equals 2. Although it decreases when the rank increases to 3 because higher ranks would lead to more isoform candidates, it becomes relatively stable after rank equals 4. In **Figure 2(b)**, Gene *FBgn0037215* has 5 annotated isoforms with 12 subexons. NMFP has stable performance across all the rank choices.

### 3.2 Detailed information of genes on chromosome chr1 of *Mus musculus*

In the section **Simulation results in *Mus musculus*** in the main text, we did another simulation to demonstrate the performance of NMFP on mouse transcriptome. Apart

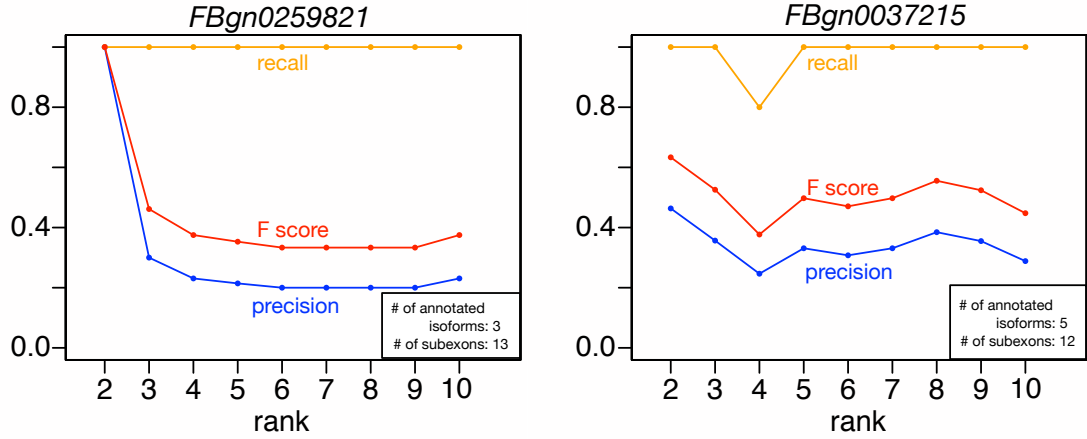

(a) Gene *FBgn0259821*

(b) Gene *FBgn0037215*

Figure 2: **The performance of NMFP in terms of the change of ranks** The orange line represents recall curve, the red line F score curve and the blue line represents precision curve.

from what has been already stated in the main text, some supplementary detail (**Table 2**) is provided here about the genes we selected to work on from chromosome chr1 of *Mus musculus* (reference genome mm10 and annotation GRCm38 of release 81). Here, a brief description is given as following about the parameters for *flux simulator* to simulate the 100 samples. The 100 samples are equally split into 10 groups, *Group 1* (Sample 1, Sample 2, ..., Sample 10), *Group 2* (Sample 11, Sample 12, ..., Sample 20), ..., *Group 10* (Sample 91, Sample 92, ..., Sample 100). For *Group i*, NB\_MOLECULES for *Expression* step is  $(20 + i) \cdot 200000$ . For the  $(10 \cdot (i - 1) + j)$ <sub>th</sub> sample within *Group i*, READ\_NUMBER for *Sequencing* step is  $(10 + j) \cdot 1000000$  (**Table 1**). All the samples share other parameters such as that they all use paired-end reads with length of  $2 \times 76$  bp.

### 3.3 Increased robustness of NMFP+SLIDE to the choices of parameter $\lambda$ (More results)

Continued from the main text, here we include two more simulation results to show that NMFP can help SLIDE achieve better isoform discovery accuracy at lower values of  $\lambda$ , the regularization parameter used in the LASSO step in SLIDE. Hence, the choice of a proper value for  $\lambda$  becomes an easier task for SLIDE+NMFP than for SLIDE. In **Figure 3 (a)**, Gene *ENSMUSG00000025905* has 5 annotated isoforms with 12 subexons. The rank is set

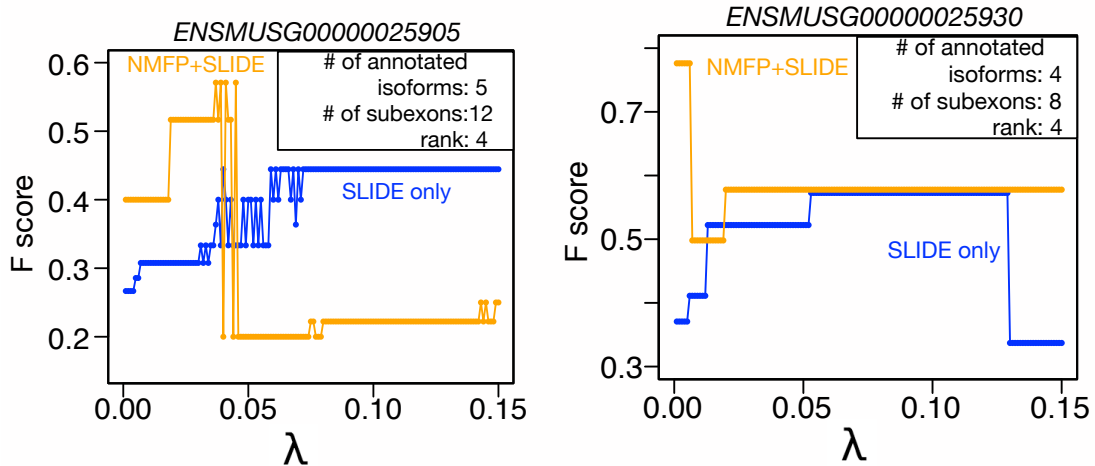

(a) Gene *ENSMUSG00000025905*

(b) Gene *ENSMUSG00000025930*

Figure 3: **The performance of NMFP+SLIDE vs. SLIDE at various  $\lambda$  values.** The orange line represents the F scores of NMFP+SLIDE, while the blue line represents the F scores of SLIDE alone.

as 4. NMFP+SLIDE has much higher F scores than SLIDE for  $\lambda < 0.04$ . In **Figure 3 (b)**, Gene *ENSMUSG00000025930* has 4 annotated isoforms with 8 subexons. The NMF rank is set as 4. We also observe that NMFP+SLIDE has better performance than SLIDE especially when  $\lambda < 0.015$ . Since NMFP can largely reduce the isoform candidate pool for SLIDE, it is recommended to use a small  $\lambda$  value for NMFP+SLIDE.

Table 1: **Parameters for the 100 simulated samples of *Mus musculus***

|              | Sample 1     | Sample 2     | ... | Sample 10    | Sample 11    | ... | Sample 20    | ... |
|--------------|--------------|--------------|-----|--------------|--------------|-----|--------------|-----|
| NB_MOLECULES | 4, 200, 000  | 4, 200, 000  | ... | 4, 200, 000  | 4, 400, 000  | ... | 4, 400, 000  | ... |
| READ_NUMBER  | 11, 000, 000 | 12, 000, 000 | ... | 20, 000, 000 | 11, 000, 000 | ... | 20, 000, 000 | ... |

### 3.4 Real data case study (More results)

Continued from the main text, we use another two cases to show that NMFP has good performance on real data. In **Figure 4**, RNA-seq reads for gene *FBgn0019936* were generated by the modENCODE consortium [3] from *D. melanogaster* L3 stage larvae and 12 hours post-molt (SRA accession: SRS004682; see the Supplemental Material “Updated Table S2.xlsx” in [4] for more details). This gene has 1 annotated isoform (shown in orange), which is well supported by the RNA-seq reads (shown in gray). Cufflinks alone connected the latter three exons together with the introns in between into one piece (shown in light blue). NMFP+Cufflinks accurately assembled the annotated isoform and recovered another isoform (shown in dark blue), which reflects the low read counts of the Exon 3. Similarly, NMFP+SLIDE at  $\lambda = 0.2$  (“more”, shown in dark green) and  $\lambda = 0.01$  (“fewer”, shown in dark red) achieved better isoform discovery results than their SLIDE counterparts (shown in light green and light red). In **Figure 5**, RNA-seq reads for gene *FBgn0038145* were also generated by the modENCODE consortium from the heads of mated female *D. melanogaster* after 1 day of eclosion (SRA accession: SRR070434, SRR070435 and SRR100279; see the Supplemental Material “Updated Table S2.xlsx” in [4] for more details). *FBgn0038145* has a complicated splicing structure and 5 annotated isoforms (shown in orange). Cufflinks alone assembled one transcript (shown in light blue) similar to the first annotated one except that part of Exon 1 is missed. NMFP+Cufflinks identified 4 isoforms (shown in dark blue) among which 2 are annotated. NMFP also improved the performance of SLIDE at both  $\lambda = 0.2$  (“more”, shown in light and dark green) and  $\lambda = 0.01$  (“fewer”, shown in light and dark red). One significant contribution of NMFP to Cufflinks and SLIDE is capturing Exon 2, which is missed by Cufflinks and SLIDE alone because of its low read coverage compared to the other exons.

Table 2: **Summary of the genes used in the section “Simulation results in *Mus musculus*” in the main text.** The table lists the numbers of the genes that have 3-30 subexons and 2-17 annotated isoforms.

| # of subexons $n$ | $3 \leq n \leq 6$ | $7 \leq n \leq 10$ | $11 \leq n \leq 14$ | $15 \leq n \leq 18$ | $19 \leq n \leq 22$ | $n \geq 23$ |
|-------------------|-------------------|--------------------|---------------------|---------------------|---------------------|-------------|
|                   | 155               | 185                | 163                 | 134                 | 89                  | 126         |
| # of isoforms $q$ | $2 \leq q \leq 3$ | $4 \leq q \leq 5$  | $6 \leq q \leq 7$   | $8 \leq q \leq 9$   | $10 \leq q \leq 11$ | $q \geq 12$ |
|                   | 382               | 206                | 133                 | 81                  | 22                  | 28          |

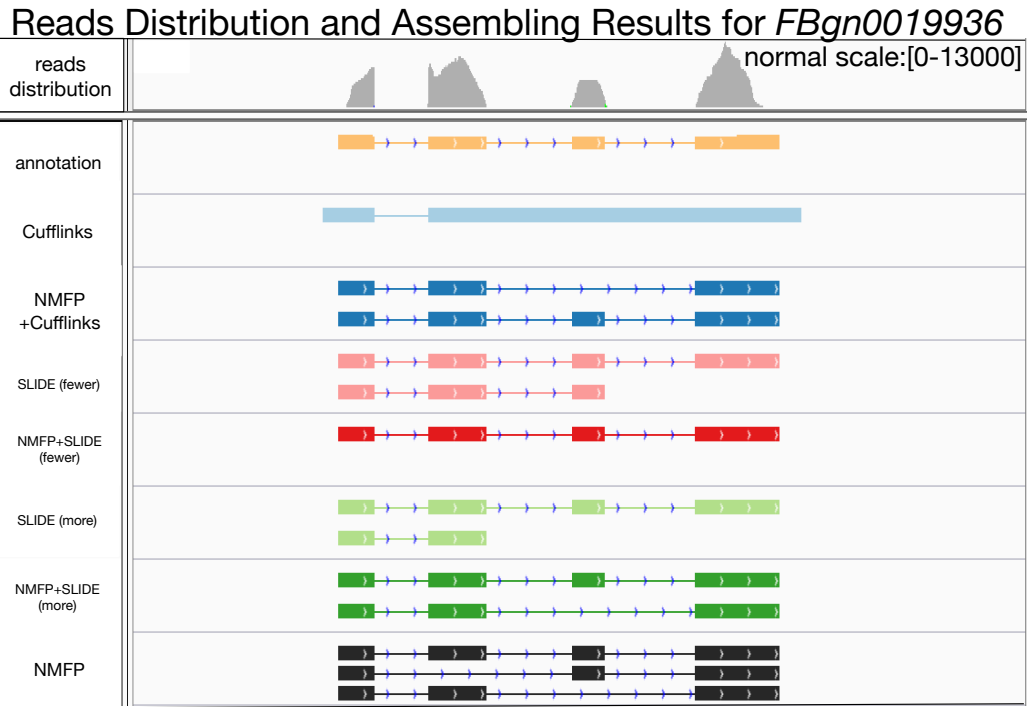

Figure 4: Real data results for Gene *FBgn0019936*

## 4 Parameters for Flux Simulator

In this Section, we append the detailed contents of the parameter file for Sample 1 in “Simulation results in *D.melanogaster*” of the main text. The parameter file is required for *flux simulator* to simulate RNAseq reads. Note that REF\_FILE\_NAME is the name for the annotation file (chr3R part of annotation Ensembl BDGP6 of release 80) and GEN\_DIR is a directory to store its corresponding genome files (genome dm6). Please refer to [Flux Simulator](#) for more details.



## Reads Distribution and Assembly Results for *FBgn0038145*

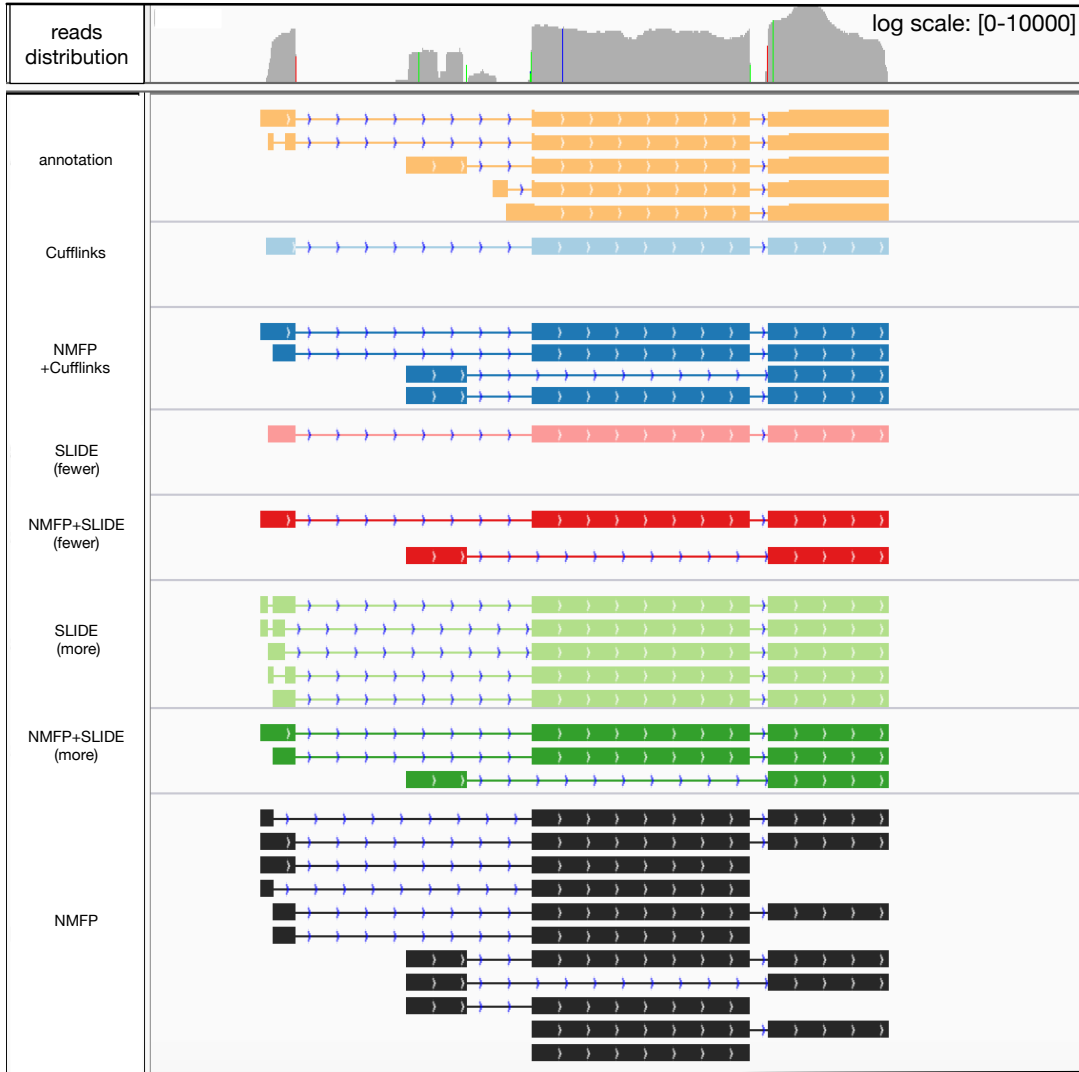

Figure 5: Real data results for Gene *FBgn0038145*

##### The parameter file for Sample 1 #####

## File locations

REF\_FILE\_NAME chr3R\_BDGP6.gtf  
GEN\_DIR chromFa/

## Expression

NB\_MOLECULES 1000000  
TSS\_MEAN 25  
POLYA\_SCALE 300  
POLYA\_SHAPE 2  
EXPRESSION\_X0 9500  
EXPRESSION\_X1 90250000

## Fragmentation

FRAG\_SUBSTRATE DNA  
FRAG\_METHOD UR  
FRAG\_UR\_ETA 300  
FRAG\_UR\_DO 76

## RT parameters

RTRANSCRIPTION YES  
RT\_MOTIF default  
RT\_PRIMER RH  
RT\_LOSSLESS YES  
RT\_MIN 500  
RT\_MAX 5500

## PCR / Filtering

PCR\_DISTRIBUTION default  
FILTERING YES  
SIZE\_DISTRIBUTION N(300,74)  
SIZE\_SAMPLING AC

# Sequencing

READ\_NUMBER 5000000  
READ\_LENGTH 76  
PAIRED\_END YES  
FASTA YES  
ERR\_FILE 76  
UNIQUE\_IDS YES

## 5 Summary of 74 real data samples

Tables 3-10 summarize the description of the 74 *D. melanogaster* RNA-seq data sets [3, 4] we use in our real data case study.

### References

- [1] Li, J.J., Jiang, C.-R., Brown, J.B., Huang, H., Bickel, P.J.: Sparse linear modeling of next-generation mrna sequencing (rna-seq) data for isoform discovery and abundance estimation. *Proceedings of the National Academy of Sciences* **108**(50), 19867–19872 (2011)
- [2] Tibshirani, R., Walther, G., Hastie, T.: Estimating the number of clusters in a data set via the gap statistic. *Journal of the Royal Statistical Society: Series B (Statistical Methodology)* **63**(2), 411–423 (2001)
- [3] Gerstein, M.B., Rozowsky, J., Yan, K.-K., Wang, D., Cheng, C., Brown, J.B., Davis, C.A., Hillier, L., Sisu, C., Li, J.J., *et al.*: Comparative analysis of the transcriptome across distant species. *Nature* **512**(7515), 445–448 (2014)
- [4] Li, J.J., Huang, H., Bickel, P.J., Brenner, S.E.: Comparison of *d. melanogaster* and *c. elegans* developmental stages, tissues, and cells by modencode rna-seq data. *Genome research* **24**(7), 1086–1101 (2014)

Table 3: **Summary of RNA-seq reads from 74 real data samples for *D.melanogaster* (Part I).** All these reads were generated from *Illumina* RNA-seq.

|                       |                                      |                                      |                                      |                                       |                                       |
|-----------------------|--------------------------------------|--------------------------------------|--------------------------------------|---------------------------------------|---------------------------------------|
| Sample Name           | Embryo0-2h                           | Embryo2-4h                           | Embryo4-6h                           | Embryo6-8h                            | Embryo8-10h                           |
| SRA accession         | SRS004668                            | SRS004669                            | SRS004670                            | SRS004671                             | SRS004672                             |
| Sample Description    | Embyros, 0-2 hour after egg laying   | Embyros, 2-4 hour after egg laying   | Embyros, 4-6 hour after egg laying   | Embyros, 6-8 hours after egg laying   | Embyros, 8-10 hours after egg laying  |
| Organ/Tissue          | Whole organism                       | Whole organism                       | Whole organism                       | Whole organism                        | Whole organism                        |
| Age                   | Embryo                               | Embryo                               | Embryo                               | Embryo                                | Embryo                                |
| Sex                   | Mixed Male/Female                    | Mixed Male/Female                    | Mixed Male/Female                    | Mixed Male/Female                     | Mixed Male/Female                     |
| Single- vs paired-end | paired                               | paired                               | paired                               | paired                                | paired                                |
| Reads sequenced(M)    | 101                                  | 80                                   | 193                                  | 119                                   | 108                                   |
| Sample Name           | Embryo10-12h                         | Embryo12-14h                         | Embryo14-16h                         | Embryo16-18h                          | Embryo18-20h                          |
| SRA accession         | SRS004673                            | SRS004674                            | SRS004675                            | SRS004676                             | SRS004677                             |
| Sample Description    | Embyros, 10-12 hour after egg laying | Embyros, 12-14 hour after egg laying | Embyros, 14-16 hour after egg laying | Embyros, 16-18 hours after egg laying | Embyros, 18-20 hours after egg laying |
| Organ/Tissue          | Whole organism                       | Whole organism                       | Whole organism                       | Whole organism                        | Whole organism                        |
| Age                   | Embryo                               | Embryo                               | Embryo                               | Embryo                                | Embryo                                |
| Sex                   | Mixed Male/Female                    | Mixed Male/Female                    | Mixed Male/Female                    | Mixed Male/Female                     | Mixed Male/Female                     |
| Single- vs paired-end | paired                               | paired                               | paired                               | paired                                | paired                                |
| Reads sequenced(M)    | 139                                  | 180                                  | 137                                  | 117                                   | 127                                   |

Table 4: **Summary of RNA-seq reads from 74 real data samples for *D.melanogaster* (Part II).** All these reads were generated from *Illumina* RNA-seq.

|                       |                                                |                                                 |                                           |                   |                                      |
|-----------------------|------------------------------------------------|-------------------------------------------------|-------------------------------------------|-------------------|--------------------------------------|
| Sample Name           | Embryo20-22h                                   | Embryo22-24h                                    | L1                                        | L2                | L3+12h                               |
| SRA accession         | SRS004678                                      | SRS004679                                       | SRS004680                                 | SRS004681         | SRS004682                            |
| Sample Description    | Embryos, 20-22 hour after egg laying           | Embryos,22-24 hour after egg laying             | Embryos, L1 stage larvae                  | L2 stage larvae   | L3 stage larvae, 12 hr post-molt     |
| Organ/Tissue          | Whole organism                                 | Whole organism                                  | Whole organism                            | Whole organism    | Whole organism                       |
| Age                   | Embryo                                         | Embryo                                          | L1                                        | L2                | L3                                   |
| Sex                   | Mixed Male/Female                              | Mixed Male/Female                               | Mixed Male/Female                         | Mixed Male/Female | Mixed Male/Female                    |
| Single- vs paired-end | paired                                         | paired                                          | paired                                    | paired            | paired                               |
| Reads sequenced(M)    | 74                                             | 155                                             | 126                                       | 189               | 73                                   |
| Sample Name           | L3PS1-2                                        | L3PS3-6                                         | L3PS7-9                                   | Prepupae          | Prepupae+12h                         |
| SRA accession         | SRS004686                                      | SRS004687                                       | SRS004867                                 | SRS004668         | SRS004701                            |
| Sample Description    | L3 stage larvae, dark blue gut, puff stage 1-2 | L3 stage larvae, light blue gut, puff stage 3-6 | L3 stage larvae, clear gut puff stage 7-9 | White prepupae    | Pupae, 12 hours after white prepupae |
| Organ/Tissue          | Whole organism                                 | Whole organism                                  | Whole organism                            | Whole organism    | Whole organism                       |
| Age                   | L4                                             | L5                                              | L6                                        | Pupa              | Pupa                                 |
| Sex                   | Mixed Male/Female                              | Mixed Male/Female                               | Mixed Male/Female                         | Mixed Male/Female | Mixed Male/Female                    |
| Single- vs paired-end | paired                                         | paired                                          | paired                                    | paired            | paired                               |
| Reads sequenced(M)    | 80                                             | 73                                              | 103                                       | 114               | 129                                  |

Table 5: **Summary of RNA-seq reads from 74 real data samples for *D.melanogaster* (Part III).** All these reads were generated from *Illumina* RNA-seq.

|                       |                                      |                                    |                                      |                                     |                                      |
|-----------------------|--------------------------------------|------------------------------------|--------------------------------------|-------------------------------------|--------------------------------------|
| Sample Name           | Prepupae+24h                         | Prepupae+2d                        | Prepupae+3d                          | Prepupae+4d                         | Male+1d                              |
| SRA accession         | SRS004702                            | SRS004869                          | SRS004870                            | SRS004703                           | SRS004695                            |
| Sample Description    | Pupae, 24 hours after white prepupae | Pupae, 2 days after white prepupae | Pupae, 3 days after white prepupae   | Pupae, 4 days after white prepupae  | Adult male, one day after eclosion   |
| Organ/Tissue          | Whole organism                       | Whole organism                     | Whole organism                       | Whole organism                      | Whole organism                       |
| Age                   | Pupa                                 | Pupa                               | Pupa                                 | Pupa                                | Adult                                |
| Sex                   | Mixed Male/Female                    | Mixed Male/Female                  | Mixed Male/Female                    | Mixed Male/Female                   | Male                                 |
| Single- vs paired-end | paired                               | paired                             | paired                               | paired                              | paired                               |
| Reads sequenced(M)    | 105                                  | 117                                | 154                                  | 106                                 | 112                                  |
| Sample Name           | Male+5d                              | Male+30d                           | Female+1d                            | Female+5d                           | Female+30d                           |
| SRA accession         | SRS004696                            | SRS004697                          | SRS004689                            | SRS004693                           | SRS004692                            |
| Sample Description    | Adult male, 5 days after eclosion    | Adult male, 30 days after eclosion | Adult female, one day after eclosion | Adult female, 5 days after eclosion | Adult female, 30 days after eclosion |
| Organ/Tissue          | Whole organism                       | Whole organism                     | Whole organism                       | Whole organism                      | Whole organism                       |
| Age                   | Adult                                | Adult                              | Adult                                | Adult                               | Adult                                |
| Sex                   | Male                                 | Male                               | Female                               | Female                              | Female                               |
| Single- vs paired-end | paired                               | paired                             | paired                               | paired                              | paired                               |
| Reads sequenced(M)    | 123                                  | 104                                | 122                                  | 91                                  | 90                                   |

Table 6: **Summary of RNA-seq reads from 74 real data samples for *D.melanogaster* (Part IV).** All these reads were generated from *Illumina* RNA-seq.

|                       |                                               |                                                    |                                                       |                                                      |                                                        |
|-----------------------|-----------------------------------------------|----------------------------------------------------|-------------------------------------------------------|------------------------------------------------------|--------------------------------------------------------|
| Sample Name           | CarcassL3                                     | CarcassMixed<br>MaleFemale<br>+1d                  | CarcassMixed<br>MaleFemale<br>+4d                     | CarcassMixed<br>MaleFemale<br>+20d                   | FatL3                                                  |
| SRA accession         | SRR100269,<br>SRR070426                       | SRR070395,<br>SRR070399                            | SRR070387,<br>SRR070402                               | SRR070391,<br>SRR070404                              | SRR070405,<br>SRR070406                                |
| Sample Description    | third instar larvae, wandering stage, carcass | mixed males and females, eclosion + 1 day, carcass | mixed males and females, eclosion + 4 days, carcass   | mixed males and females, eclosion + 20 days, carcass | third instar larvae, wandering stage, fat body         |
| Organ/Tissue          | Muscle                                        | Muscle                                             | Muscle                                                | Muscle                                               | Endocrine/Liver                                        |
| Age                   | L3                                            | Adult                                              | Adult                                                 | Adult                                                | L3                                                     |
| Sex                   | Mixed<br>Male/Female                          | Mixed<br>Male/Female                               | Mixed<br>Male/Female                                  | Mixed<br>Male/Female                                 | Mixed<br>Male/Female                                   |
| Single- vs paired-end | paired                                        | paired                                             | paired                                                | paired                                               | paired                                                 |
| Reads sequenced(M)    | 88                                            | 115                                                | 92                                                    | 64                                                   | 61                                                     |
| Sample Name           | FatPrepupae                                   | FatPrepupae<br>FatPrepupae                         | SalivaryGlands<br>L3                                  | SalivaryGlands<br>Prepupae                           | DigestiveSystem<br>L3                                  |
| SRA accession         | SRR070411,<br>SRR070428                       | SRR070429,<br>SRR070413                            | SRR070425,<br>SRR070407                               | SRR070427,<br>SRR100270                              | SRR100268,<br>SRR070408                                |
| Sample Description    | white prepupae, fat body                      | pupae, white prepupae+2d, fat                      | third instar larvae, wandering stage, salivary glands | white prepupae, salivary glands                      | third instar larvae, wandering stage, digestive system |
| Organ/Tissue          | Endocrine/Liver                               | Endocrine/Liver                                    | Exocrine gland                                        | Exocrine gland                                       | Gut                                                    |
| Age                   | L4/Pupa                                       | L4/Pupa                                            | L3                                                    | L4/Pupa                                              | L3                                                     |
| Sex                   | Mixed<br>Male/Female                          | Mixed<br>Male/Female                               | Mixed<br>Male/Female                                  | Mixed<br>Male/Female                                 | Mixed<br>Male/Female                                   |
| Single- vs paired-end | paired                                        | paired                                             | paired                                                | paired                                               | paired                                                 |
| Reads sequenced(M)    | 93                                            | 55                                                 | 83                                                    | 94                                                   | 94                                                     |

Table 7: **Summary of RNA-seq reads from 74 real data samples for *D.melanogaster* (Part V).** All these reads were generated from *Illumina* RNA-seq.

|                          |                                                                         |                                                                            |                                                                             |                                                                                 |                                             |
|--------------------------|-------------------------------------------------------------------------|----------------------------------------------------------------------------|-----------------------------------------------------------------------------|---------------------------------------------------------------------------------|---------------------------------------------|
| Sample Name              | DigestiveSystem<br>MixedMaleFe-<br>male+1d                              | DigestiveSystem<br>MixedMaleFe-<br>male+4d                                 | DigestiveSystem<br>MixedMaleFe-<br>male+20d                                 | ImaginalDiscsL3                                                                 | CNSL3                                       |
| SRA accession            | SRR070394,<br>SRR070398                                                 | SRR070401,<br>SRR070386,<br>SRR111878,<br>SRR111879                        | SRR070403,<br>SRR070390,<br>SRR111883                                       | SRR070392,<br>SRR111884,<br>SRR350962,<br>SRR070393,<br>SRR111885,<br>SRR350963 | SRR070409,<br>SRR070410                     |
| Sample De-<br>scription  | mixed males<br>and females,<br>eclosion + 1<br>day, digestive<br>system | mixed males<br>and females,<br>eclosion + 4<br>days, diges-<br>tive system | mixed males<br>and females,<br>eclosion + 20<br>days, diges-<br>tive system | third instar<br>larvae, wan-<br>dering stage,<br>imaginal discs                 | third instar<br>larvae, CNS                 |
| Organ/Tissue             | Gut                                                                     | Gut                                                                        | Gut                                                                         | Epithelial                                                                      | Neural                                      |
| Age                      | Adult                                                                   | Adult                                                                      | Adult                                                                       | L3                                                                              | L3                                          |
| Sex                      | Mixed<br>Male/Female                                                    | Mixed<br>Male/Female                                                       | Mixed<br>Male/Female                                                        | Mixed<br>Male/Female                                                            | Mixed<br>Male/Female                        |
| Single- vs<br>paired-end | paired                                                                  | paired                                                                     | paired                                                                      | paired                                                                          | paired                                      |
| Reads se-<br>quenced(M)  | 60                                                                      | 165                                                                        | 106                                                                         | 415                                                                             | 62                                          |
| Sample Name              | CNSPrepupae<br>+2d                                                      | HeadsVirgin<br>Female+1d                                                   | HeadsVirgin<br>Female+4d                                                    | HeadsVirgin<br>Female+20d                                                       | HeadsMated<br>Female+1d                     |
| SRA accession            | SRR100271,<br>SRR070412                                                 | SRR070436,<br>SRR070437,<br>SRR100281                                      | SRR070430,<br>SRR100278,<br>SRR100282                                       | SRR070388,<br>SRR070419,<br>SRR100275                                           | SRR070434,<br>SRR070435,<br>SRR100279       |
| Sample De-<br>scription  | pupae, white<br>prepupae+2d,<br>CNS                                     | virgin female,<br>eclosion + 1<br>day, heads                               | virgin female,<br>eclosion + 4<br>days, heads                               | virgin female,<br>eclosion + 20<br>days, heads                                  | mated female,<br>eclosion + 1<br>day, heads |
| Organ/Tissue             | Neural                                                                  | Neural                                                                     | Neural                                                                      | Neural                                                                          | Neural                                      |
| Age                      | L4/Pupa                                                                 | Adult                                                                      | Adult                                                                       | Adult                                                                           | Adult                                       |
| Sex                      | Mixed<br>Male/Female                                                    | Female                                                                     | Female                                                                      | Female                                                                          | Female                                      |
| Single- vs<br>paired-end | paired                                                                  | paired                                                                     | paired                                                                      | paired                                                                          | paired                                      |
| Reads se-<br>quenced(M)  | 104                                                                     | 278                                                                        | 253                                                                         | 114                                                                             | 264                                         |



Table 8: **Summary of RNA-seq reads from 74 real data samples for *D.melanogaster* (Part VI).** All these reads were generated from *Illumina* RNA-seq.

|                          |                                                 |                                                     |                                                                   |                                                                                                                           |                                            |
|--------------------------|-------------------------------------------------|-----------------------------------------------------|-------------------------------------------------------------------|---------------------------------------------------------------------------------------------------------------------------|--------------------------------------------|
| Sample Name              | HeadsMated<br>Female+4d                         | HeadsMated<br>Female+20d                            | HeadsMated<br>Male+1d                                             | IHeadsMated<br>Male+4d                                                                                                    | HeadsMated<br>Male+20d                     |
| SRA accession            | SRR070414,<br>SRR070415                         | SRR116383,<br>SRR111882,<br>SRR070420,<br>SRR100274 | SRR070432,<br>SRR070433,<br>SRR100280                             | SRR070416,<br>SRR070400                                                                                                   | SRR070421,<br>SRR070424                    |
| Sample De-<br>scription  | mated female,<br>eclosion + 4<br>days, heads    | mated female,<br>eclosion + 20<br>days, heads       | mated male,<br>eclosion + 1<br>day, heads                         | mated male,<br>eclosion + 4<br>day, heads                                                                                 | mated male,<br>eclosion + 20<br>day, heads |
| Organ/Tissue             | Neural                                          | Neural                                              | Neural                                                            | Neural                                                                                                                    | Neural                                     |
| Age                      | Adult                                           | Adult                                               | Adult                                                             | Adult                                                                                                                     | Adult                                      |
| Sex                      | Female                                          | Female                                              | Male                                                              | Male                                                                                                                      | Male                                       |
| Single- vs<br>paired-end | paired                                          | paired                                              | paired                                                            | paired                                                                                                                    | paired                                     |
| Reads se-<br>quenced(M)  | 138                                             | 71                                                  | 196                                                               | 127                                                                                                                       | 105                                        |
| Sample Name              | OvariesVirgin<br>Female+4d                      | OvariesMated<br>Female+4d                           | TestesMated<br>Male+4d                                            | AccessoryGlands(Embryo)<br>Mated-<br>Male+4d                                                                              | GM2                                        |
| SRA accession            | SRR070396,<br>SRR070417                         | SRR070431,<br>SRR100277,<br>SRR100283               | SRR070422,<br>SRR350960,<br>SRR070423,<br>SRR100276,<br>SRR350961 | SRR070397,<br>SRR111880,<br>SRR182357,<br>SRR070418,<br>SRR100272,<br>SRR100273,<br>SRR111881,<br>SRR182358,<br>SRR350959 | SRR070278,<br>SRR070265,<br>SRR070263      |
| Sample De-<br>scription  | virgin female,<br>eclosion + 4<br>days, ovaries | mated female,<br>eclosion + 4<br>days, ovaries      | mated male,<br>eclosion + 4<br>days, testes                       | mated male,<br>eclosion + 4<br>days, acces-<br>sory glands                                                                | cell line GM2<br>from embryos              |
| Organ/Tissue             | Gonad                                           | Gonad                                               | Gonad                                                             | N.D.                                                                                                                      | N.D.                                       |
| Age                      | Adult                                           | Adult                                               | Adult                                                             | Adult                                                                                                                     | Embryo                                     |
| Sex                      | Female                                          | Female                                              | Male                                                              | Male                                                                                                                      | N.D.                                       |
| Single- vs<br>paired-end | paired                                          | paired                                              | paired                                                            | paired                                                                                                                    | single/paired                              |
| Reads se-<br>quenced(M)  | 115                                             | 273<br>17                                           | 473                                                               | 107                                                                                                                       | 65                                         |

Table 9: **Summary of RNA-seq reads from 74 real data samples for *D.melanogaster* (Part VII).** All these reads were generated from *Illumina* RNA-seq.

|                       |                                                     |                                           |                                                |                                                |                                                      |
|-----------------------|-----------------------------------------------------|-------------------------------------------|------------------------------------------------|------------------------------------------------|------------------------------------------------------|
| Sample Name           | (Embryo) Kc167                                      | (Embryo) S1                               | (Embryo) S2_R_plus                             | (Embryo) S3                                    | (L3 prothoracic leg disc) CME_L1                     |
| SRA accession         | SRR070261, SRR070269, SRR111873, SRR070292          | SRR070280, SRR070286, SRR111877           | SRR1197280                                     | SRR070259, SRR111872, SRR189834, SRR189835     | SRR070282, SRR070288                                 |
| Sample Description    | cell line Kc167 from embryos                        | cell line S1 from embryos                 | cell line S2 from embryos                      | cell line S3 from embryos                      | cell line CME_L1 from L3 larva prothoracic leg discs |
| Organ/Tissue          | N.D.                                                | N.D.                                      | N.D.                                           | N.D.                                           | ventral prothoracic disc                             |
| Age                   | Embryo                                              | Embryo                                    | Embryo                                         | Embryo                                         | L3                                                   |
| Sex                   | Female                                              | N.D.                                      | N.D.                                           | N.D.                                           | N.D.                                                 |
| Single- vs paired-end | single/paired                                       | single/paired                             | single/paired                                  | single/paired                                  | single/paired                                        |
| Reads sequenced(M)    | 56                                                  | 48                                        | 278                                            | 132                                            | 84                                                   |
| Sample Name           | (L3 eye-antennal disc) ML-DmD11                     | (L3 wing disc) CME_W2                     | (L3 wing disc) ML-DmD16-c3                     | (L3 wing disc) ML-DmD20-c5                     | (L3 wing disc) ML-DmD32                              |
| SRA accession         | SRR070284, SRR070290, SRR111874                     | SRR070260, SRR070268, SRR111868           | SRR070283, SRR070289                           | SRR1197396                                     | SRR070281, SRR070287, SRR111875                      |
| Sample Description    | cell line ML-DmD11 from L3 larva eye-antennal discs | cell line CME_W2 from L3 larva wing discs | cell line ML-DmD16-c3 from L3 larva wing discs | cell line ML-DmD20-c5 from L3 larva wing discs | cell line ML-DmD32 from L3 larva wing discs          |
| Organ/Tissue          | eye-antennal disc                                   | dorsal mesothoracic disc                  | dorsal mesothoracic disc                       | dorsal mesothoracic disc                       | dorsal mesothoracic disc                             |
| Age                   | L3                                                  | L3                                        | L3                                             | L3                                             | L3                                                   |
| Sex                   | N.D.                                                | N.D.                                      | N.D.                                           | N.D.                                           | N.D.                                                 |
| Single- vs paired-end | single/paired                                       | single/paired                             | single/paired                                  | single/paired                                  | single/paired                                        |
| Reads sequenced(M)    | 43                                                  | 77<br>18                                  | 56                                             | 43                                             | 38                                                   |

Table 10: **Summary of RNA-seq reads from 74 real data samples for *D.melanogaster* (Part VIII).** All these reads were generated from *Illumina* RNA-seq.

|                       |                                                   |                                                         |                                         |                                                 |
|-----------------------|---------------------------------------------------|---------------------------------------------------------|-----------------------------------------|-------------------------------------------------|
| Sample Name           | (L3 haltere disc) ML-DmD17-c3                     | (L3 mixed imaginal discs) ML-DmD4-c1                    | (L3 CNS) ML-DmBG2-c2                    | (Tumorous blood cells) MBN2                     |
| SRA accession         | SRR070285, SRR070291                              | SRR070273, SRR111876                                    | SRR070262, SRR070270, SRR111870         | SRR070258, SRR111869, SRR189833                 |
| Sample Description    | cell line ML-DmD17-c3 from L3 larva haltere discs | cell line ML-DmD4-c1 from L3 larva mixed imaginal discs | cell line ML-DmBG2-c2 from L3 larva CNS | cell line MBN2 from tumorous blood cells        |
| Organ/Tissue          | dorsal metathoracic disc                          | imaginal disc                                           | central nervous system                  | larval circulatory system - tumorous blood cell |
| Age                   | L3                                                | L3                                                      | L3                                      | L3                                              |
| Sex                   | N.D.                                              | N.D.                                                    | N.D.                                    | N.D.                                            |
| Single- vs paired-end | single/paired                                     | paired                                                  | single/paired                           | single/paired                                   |
| Reads sequenced(M)    | 87                                                | 116                                                     | 35                                      | 75                                              |
